# Supplementary material for: Deletion of long-range sequences at Sox10 compromises developmental expression in a mouse model of Waardenburg–Shah (WS4) syndrome
Source: Oxford University Press journal article supplement (doi:10.1093/hmg/ddi442), 2005-12-05
Supplement: ddi442_Supplementary_Data.zip [file ddi442_Supplementary_Data.zip]

Archive with 1 entries (1 files):
- ddi442_Supplementary.pdf
