# Supplementary material for: Deletion of long-range sequences at Sox10 compromises developmental expression in a mouse model of Waardenburg–Shah (WS4) syndrome
Source: Oxford University Press journal article supplement (doi:10.1093/hmg/ddi442), 2005-12-05

**Supplementary Figure A.** Localization of the *Hry* transgene

(A, B) Representative metaphase chromosome spreads from *Hry* transgenic littermates with mutant or wild-type phenotypes. Spreads were hybridized with a fluorescently-labeled transgene-specific probe (red) and counterstained with DAPI (cyan). Two hybridization signals were obtained in samples from mutant animals, indicating that they were transgene homozygous (A), whereas a single signal was obtained with samples from wild-type animals, indicating that they were transgene hemizygous (B). (C, D) Physical mapping of the *Hry* transgene to chromosome 15 was achieved by hybridization of a fluorescently-labeled transgene-specific probe (C) to metaphase chromosome spreads from a hemizygous *Hry* animal that had previously been G-banded (D). In the fluorescence image (C) the hybridization signal is visible as a pair of red spots on one chromatid pair and the corresponding position in the bright-field image (D) has been indicated with an arrow. Images were captured at a magnification of x600.

Supplementary Figure A

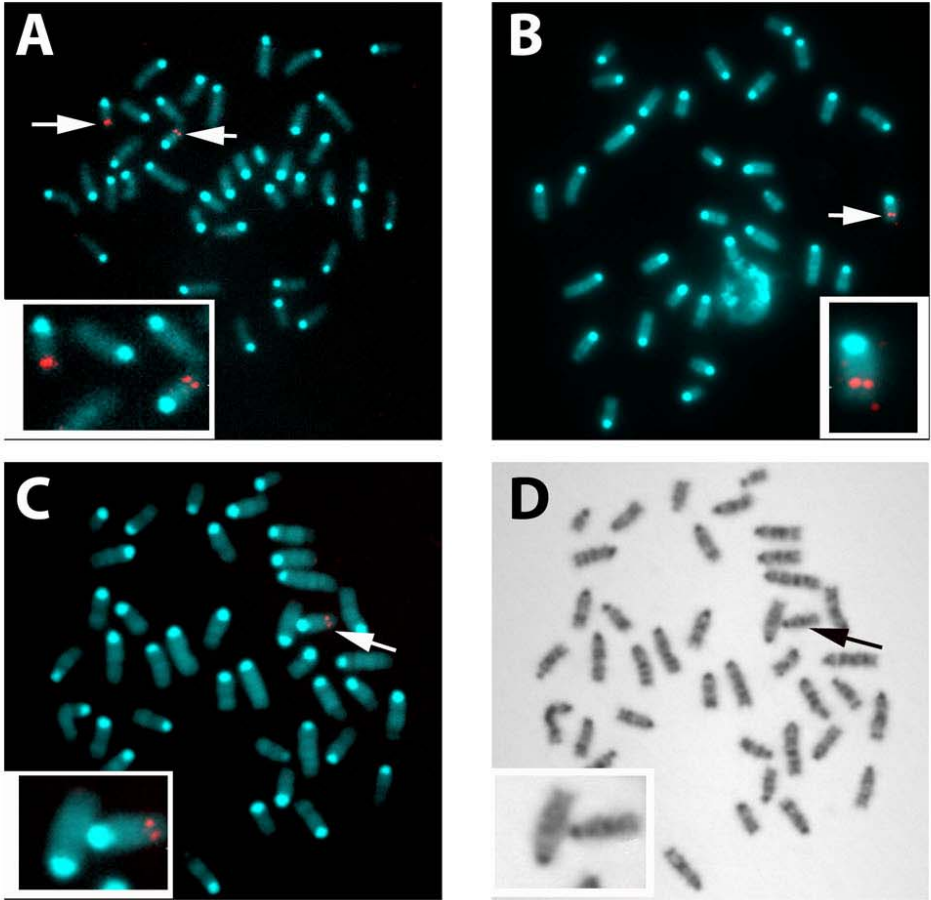

Supplement: ddi442_Supplementary_Data.zip [file ddi442_Supplementary_Data.zip › ddi442_Supplementary.pdf]
